# Supplementary material for: Natural Bioactive Substances in Fruits of Aronia melanocarpa (Michx.) Elliott Exposed to Combined Light-Type, Chitosan Oligosaccharide, and Spent Mushroom Residue Treatments
Source: MDPI journal article supplement (doi:10.3390/plants12030604), 2023-01-30
Supplement: s1 [file s1]

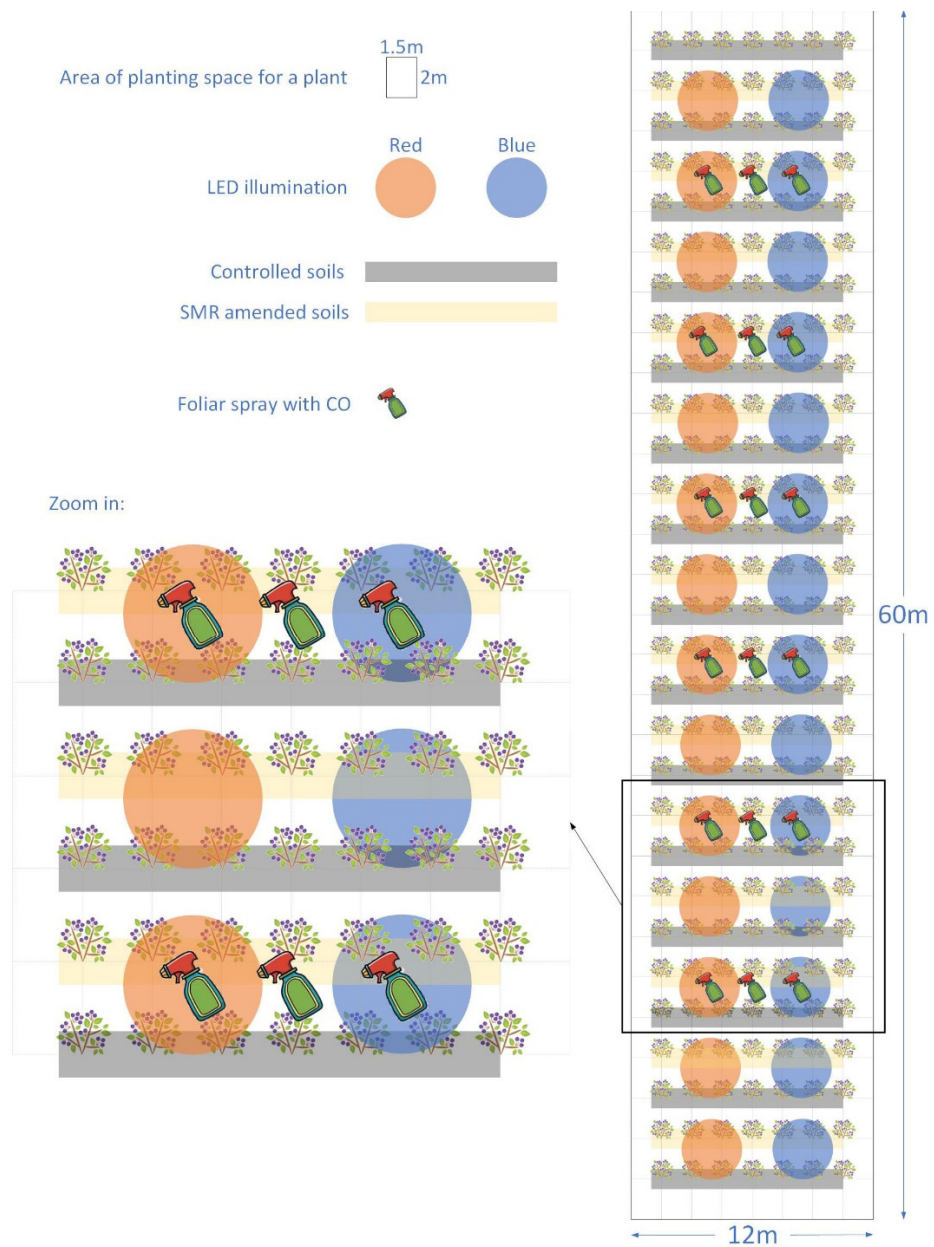

**Figure S1.** Layout of the experiment conducted in a greenhouse to culture Black chokeberry (*Aronia melanocarpa* (Michx.) Elliott 1821) Exposed to Combined Light-Type, Chitosan Oligosaccharide, and Spent Mushroom Residue Treatments.
